# Supplementary material for: A Novel Role for Subcutaneous Adipose Tissue in Exercise-Induced Improvements in Glucose Homeostasis
Source: Oxford University Press journal article supplement (doi:10.2337/db14-0704), 2015-01-20
Supplement: db140704supplementarydata.pdf [file db140704supplementarydata.pdf]

# SUPPLEMENTARY DATA

**Supplementary Figure 1. Transplantation of scWAT from sedentary or trained mice did not affect body weight, but increased energy expenditure.** **A**, Western blotting of HKII in triceps muscle of mice after 11 days of training. Data are means  $\pm$  s.e.m. ( $n=5/\text{group}$ ,  $*P<0.05$ ). **B-C**, Body weight (**B**) and total food intake over 9 days (**C**) did not differ between groups after transplantation of scWAT from either group. **D-F**, At 9 days post-transplantation mice were housed in metabolic cages for 48 hours. Data are expressed as AUC for (**D**) Activity, (**E**) Total energy expenditure and absolute value for (**F**) RER. Asterisks represent differences between Sham mice and all transplanted groups ( $*P<0.05$ ;  $**P<0.01$ ).

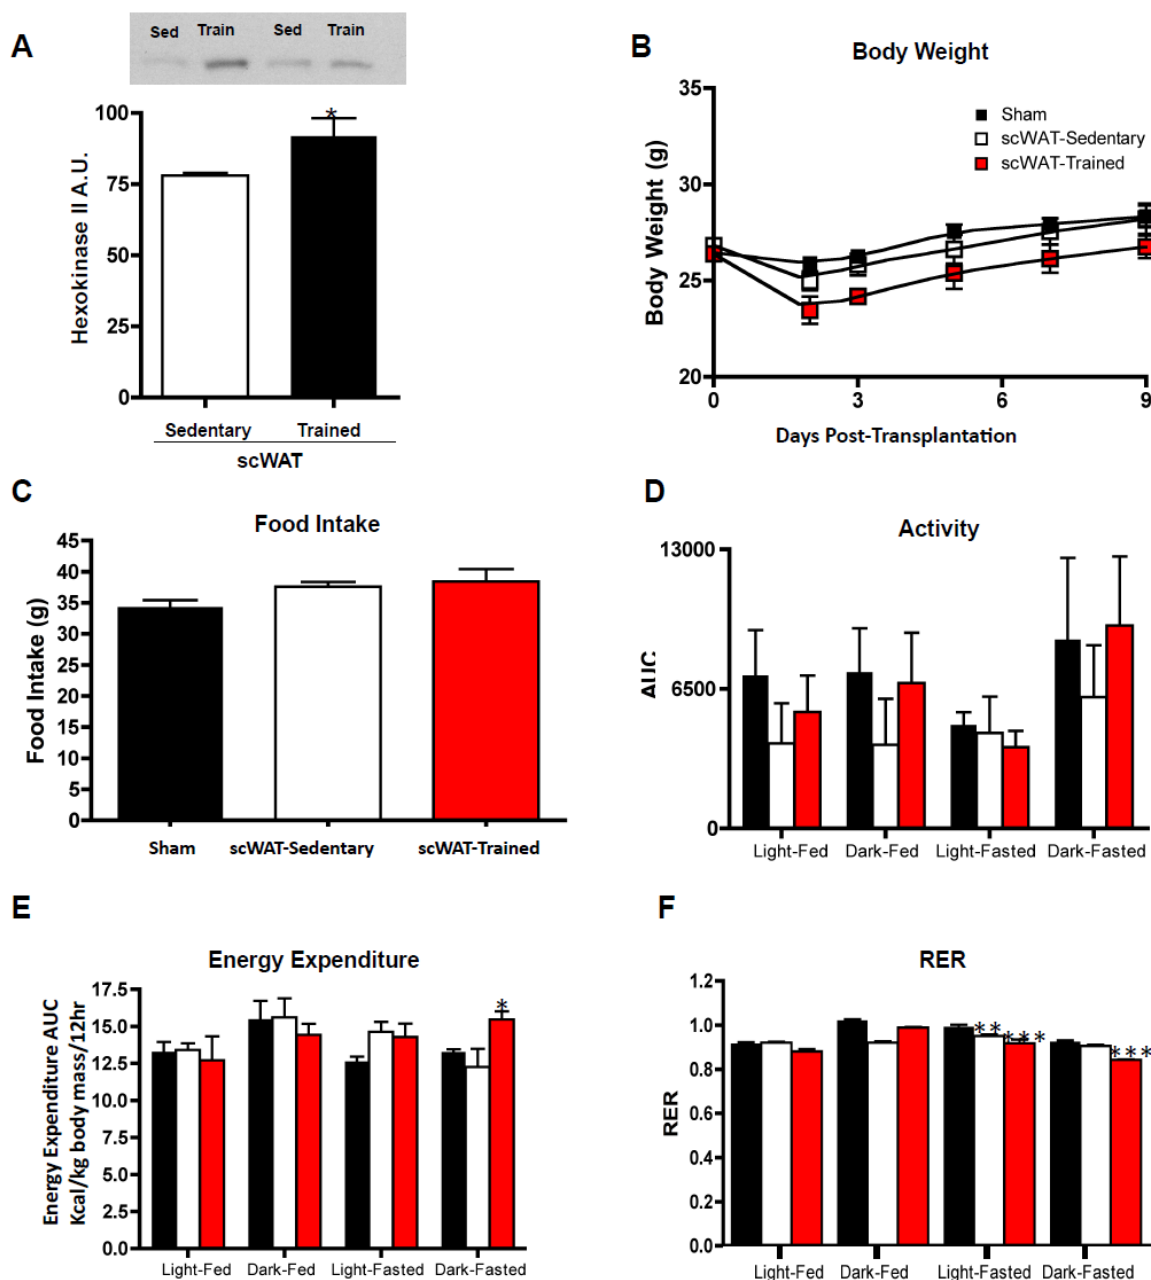

# SUPPLEMENTARY DATA

**Supplementary Figure 2. Transplantation of visceral adipose tissue from sedentary or trained mice has no effect on glucose metabolism or body weight.** A-C, Mice were transplanted with 1.0g visceral adipose tissue from trained or sedentary mice, or were Shamoperated. For glucose tolerance tests (GTT), mice were injected with 2g glucose/kg bw, intraperitoneal (i.p.). (A) GTT at 9 days post-transplantation for mice receiving 1.0g visceral adipose tissue from trained and sedentary 12-week old mice, and (B) Glucose area under the curve (AUC) at 9, 14, and 28 days post-transplantation., (C) Body weight of mice transplanted with visceral adipose tissue. D, *Ucp1* mRNA of vWAT and scWAT from sedentary and trained mice. Only scWAT has an increase in *Ucp1* in response to training. Data are means  $\pm$  s.e.m. Asterisks represent statistically significant differences between mice receiving scWAT from trained and sedentary mice and Sham-operated mice (n=5-10/group; \*\*\* $P$ <0.001).

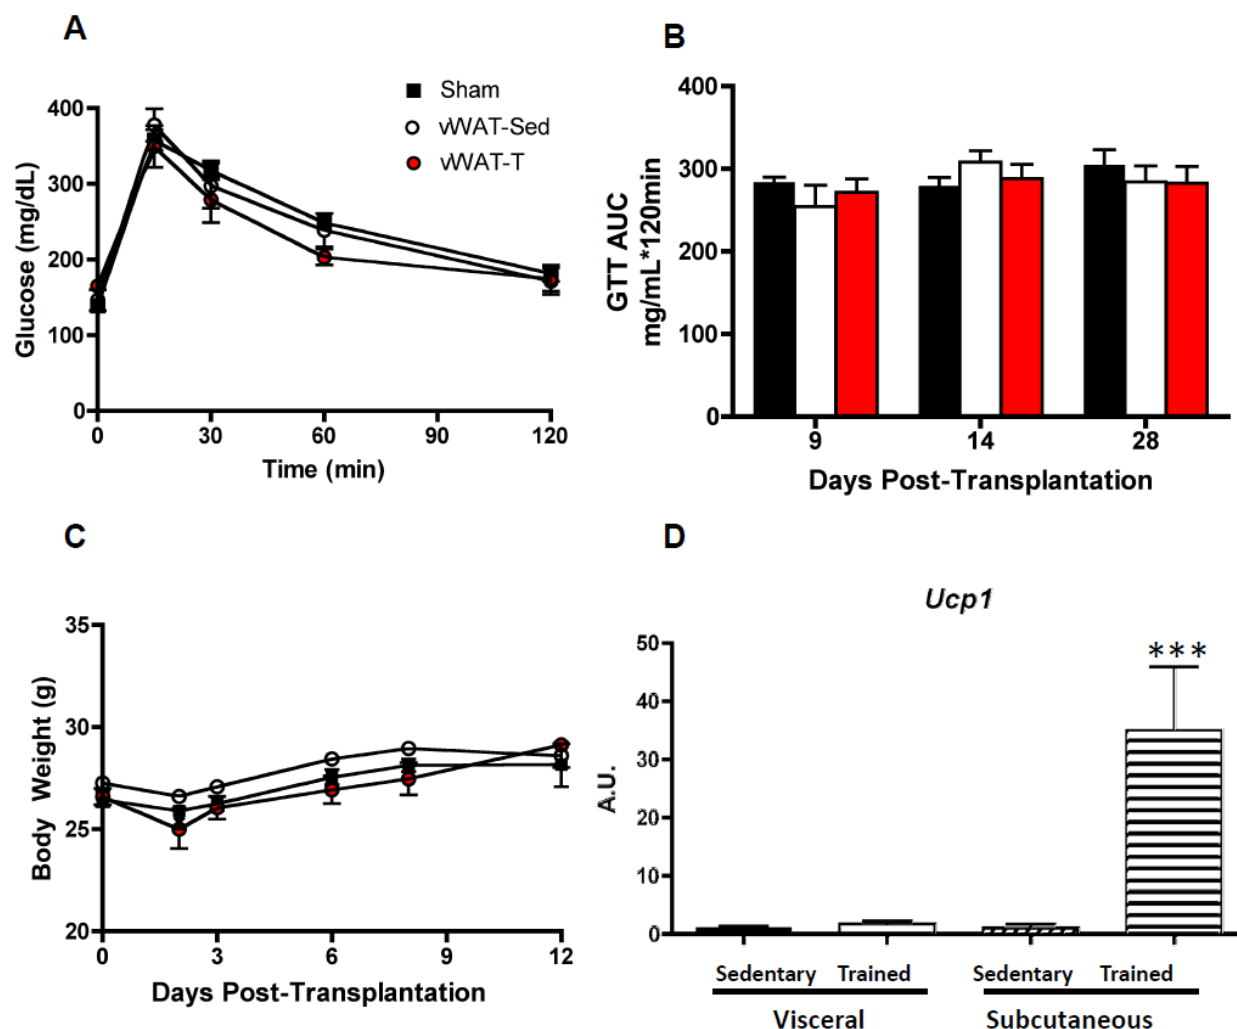

## SUPPLEMENTARY DATA

**Supplementary Figure 3. Skeletal muscle triglycerides are not different after transplantation of scWAT from sedentary or trained mice; fatty acid uptake not changed in adipocytes from trained scWAT.** **A**, Skeletal muscle (tibialis anterior) triglyceride 9 days 2 post-transplantation. Data are expressed as means  $\pm$  s.e.m. (n=4-6/group). **B-C**, Stromal vascular fraction of scWAT was isolated, cultured, and differentiated into adipocytes. Twelve days postdifferentiation (**B**) fatty acid uptake was measured. Data are means  $\pm$  s.e.m. (n=6; \* $P$ <0.05). Western blotting of UCP1 (**C**) in differentiated adipocytes. Data are means  $\pm$  s.e.m. (n=5/group, \* $P$ <0.05).

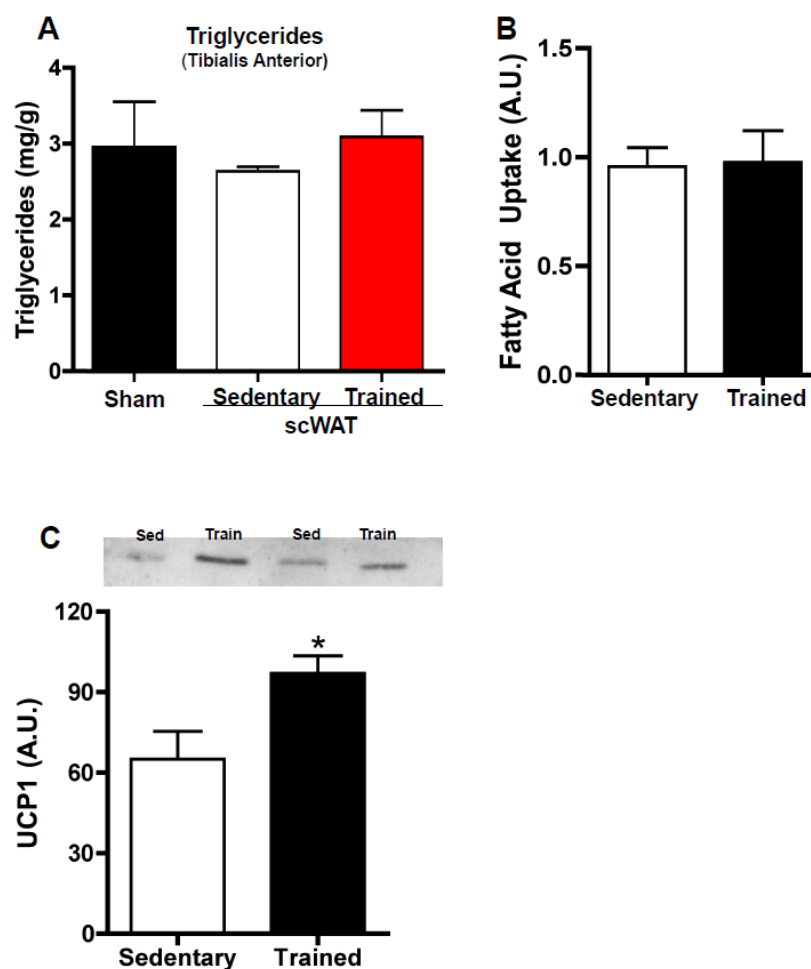

# SUPPLEMENTARY DATA

**Supplementary Table 1. Primer sequences.** Primer sequences used for mouse scWAT RT-qPCR.

| Gene   |         | Mouse (5' to 3')      |
|--------|---------|-----------------------|
| Ucp1   | Forward | CTTTGCCTCACTCAGGATTGG |
|        | Reverse | ACTGCCACACCTCCAGTCATT |
| Prdm16 | Forward | GACATTCCAATCCCACCAGA  |
|        | Reverse | CACCTCTGTATCCGTCAGCA  |

**Supplementary Table 2. Serum Concentrations of Hormones and Adipokines.** Mice were sham-operated (Sham) or transplanted with 0.85g sedentary or exercise-trained scWAT, 9-days post-transplantation. Data are means  $\pm$  s.e.m. (n=12/group). Asterisks indicate statistical significance compared to Sham (\* $P$ <0.05, \*\* $P$ <0.01).

|                                           | Sham            | scWAT-Sed                   | scWAT-Train                  |
|-------------------------------------------|-----------------|-----------------------------|------------------------------|
| <b>Basal Glucose (mg/dL)</b>              | 103 $\pm$ 6.3   | 107 $\pm$ 4.8               | 77 $\pm$ 3.3 <sup>*</sup>    |
| <b>Basal Insulin (ng/mL)</b>              | 1.03 $\pm$ 0.19 | 0.66 $\pm$ 0.35             | 0.41 $\pm$ 0.28 <sup>*</sup> |
| <b>Cholesterol (mg/dL)</b>                | 73.5 $\pm$ 2.7  | 69.8 $\pm$ 4.6              | 48.9 $\pm$ 5.1 <sup>**</sup> |
| <b>Adiponectin (<math>\mu</math>g/mL)</b> | 8161 $\pm$ 392  | 7464 $\pm$ 1031             | 6777 $\pm$ 347               |
| <b>Leptin (ng/mL)</b>                     | 3.0 $\pm$ 0.4   | 1.4 $\pm$ 0.3 <sup>*</sup>  | 1.9 $\pm$ 0.4 <sup>*</sup>   |
| <b>Triglycerides (mg/dL)</b>              | 65.0 $\pm$ 5.4  | 46.9 $\pm$ 4.3 <sup>*</sup> | 43.2 $\pm$ 2.8 <sup>*</sup>  |
| <b>IL-6 (pg/mL)</b>                       | 6.7 $\pm$ 1.1   | 10.3 $\pm$ 1.6              | 10.5 $\pm$ 1.4               |
| <b>TNF-<math>\alpha</math> (pg/mL)</b>    | 17.6 $\pm$ 3.7  | 16.4 $\pm$ 4.8              | 21.7 $\pm$ 3.0               |
| <b>FFA(mEq/dL)</b>                        | 60 $\pm$ 10     | 50 $\pm$ 10                 | 50 $\pm$ 10                  |
| <b>Norepinephrine (ng/mL)</b>             | 2.2 $\pm$ 0.3   | 2.7 $\pm$ 0.6               | 3.6 $\pm$ 0.5                |
| <b>FGF21 (pg/mL)</b>                      | 54 $\pm$ 15     | 109 $\pm$ 20                | 227 $\pm$ 66 <sup>*</sup>    |

# SUPPLEMENTARY DATA

**Supplementary Table 3. Microarray Data of Selected Genes in scWAT from Trained and Sedentary Mice.** Mice were sedentary or exercise-trained for 11 days. Data are means  $\pm$  s.e.m. (n=7). Asterisks indicate statistical significance compared to Sham.

|                                 | Sedentary         | Exercise-Trained  | P value                  |
|---------------------------------|-------------------|-------------------|--------------------------|
| <b>Prdm16</b>                   | 842 $\pm$ 98      | 1079 $\pm$ 58*    | 0.037                    |
| <b>Otopetrin</b>                | 1593 $\pm$ 368    | 3891 $\pm$ 491*   | 0.0001                   |
| <b>Cpt1b</b>                    | 1031 $\pm$ 229    | 5308 $\pm$ 695*   | 5.14 x 10 <sup>-9</sup>  |
| <b>Cidea</b>                    | 6793 $\pm$ 1484   | 22470 $\pm$ 2637* | 2.21 x 10 <sup>-7</sup>  |
| <b>Ucp1</b>                     | 2380 $\pm$ 1288   | 34906 $\pm$ 5248* | 1.75 x 10 <sup>-9</sup>  |
| <b>Cox7a1</b>                   | 1640 $\pm$ 556    | 10927 $\pm$ 1599* | 4.09 x 10 <sup>-8</sup>  |
| <b>Cox8b</b>                    | 11479 $\pm$ 2354  | 37446 $\pm$ 3415* | 3.83 x 10 <sup>-10</sup> |
| <b>Ntrk3</b>                    | 1290 $\pm$ 160    | 1758 $\pm$ 138*   | 0.02                     |
| <b>Cpn2</b>                     | 264 $\pm$ 40      | 639 $\pm$ 65*     | 8.86 x 10 <sup>-8</sup>  |
| <b>Dio2</b>                     | 374 $\pm$ 52      | 1250 $\pm$ 187*   | 6.38 x 10 <sup>-6</sup>  |
| <b>Elovl6</b>                   | 375 $\pm$ 23      | 476 $\pm$ 42*     | 0.03                     |
| <b>Adrb3</b>                    | 17665 $\pm$ 3213  | 25117 $\pm$ 1831* | 0.04                     |
| <b>S100b</b>                    | 308 $\pm$ 74      | 616 $\pm$ 128*    | 0.037                    |
| <b>Gpd2</b>                     | 1743 $\pm$ 233    | 4166 $\pm$ 583*   | 0.0001                   |
| <b>Pgc1<math>\alpha</math></b>  | 493 $\pm$ 75      | 1437 $\pm$ 129*   | 2.94 x 10 <sup>-10</sup> |
| <b>Err-<math>\gamma</math></b>  | 625 $\pm$ 58      | 696 $\pm$ 35      | 0.29                     |
| <b>Elovl3</b>                   | 1100 $\pm$ 72     | 1290 $\pm$ 39*    | 0.02                     |
| <b>Acaa2</b>                    | 6024 $\pm$ 585    | 11632 $\pm$ 1192* | 2.42 x 10 <sup>-5</sup>  |
| <b>Ppar-<math>\alpha</math></b> | 281 $\pm$ 81      | 1443 $\pm$ 302*   | 0.0002                   |
| <b>Acss1</b>                    | 132 $\pm$ 47      | 111 $\pm$ 37      | 0.73                     |
| <b>Ppar-<math>\gamma</math></b> | 7199 $\pm$ 1063   | 7631 $\pm$ 544    | 0.71                     |
| <b>Fgf21</b>                    | 212 $\pm$ 37      | 283 $\pm$ 43      | 0.21                     |
| <b>Adiponectin</b>              | 96 $\pm$ 24       | 128 $\pm$ 42      | 0.52                     |
| <b>Fabp4</b>                    | 97156 $\pm$ 2295  | 90930 $\pm$ 2471  | 0.07                     |
| <b>Lhx8</b>                     | 612 $\pm$ 120     | 759 $\pm$ 30      | 0.23                     |
| <b>Zic1</b>                     | 29 $\pm$ 10       | 37 $\pm$ 12       | 0.62                     |
| <b>Citrate Synthase</b>         | 10848 $\pm$ 614   | 15680 $\pm$ 1015* | 4.6 x 10 <sup>-5</sup>   |
| <b>Leptin</b>                   | 11041 $\pm$ 2334* | 3411 $\pm$ 549    | 0.001                    |
| <b>Pgc1<math>\beta</math></b>   | 1920 $\pm$ 195    | 3878 $\pm$ 464*   | 9.85 x 10 <sup>-5</sup>  |
| <b>Irs-1</b>                    | 5859 $\pm$ 510    | 8478 $\pm$ 371*   | 3.3 x 10 <sup>-5</sup>   |
| <b>Irs-2</b>                    | 912 $\pm$ 84      | 1081 $\pm$ 104    | 0.21                     |
| <b>CD137</b>                    | 1382 $\pm$ 177    | 1165 $\pm$ 116    | 0.31                     |
| <b>Tbx1</b>                     | 579 $\pm$ 37      | 864 $\pm$ 108*    | 0.01                     |
| <b>Tmem26</b>                   | 528 $\pm$ 88      | 412 $\pm$ 29      | 0.21                     |
| <b>Vegfa</b>                    | 1245 $\pm$ 82     | 1792 $\pm$ 107*   | 5.5 x 10 <sup>-5</sup>   |
| <b>Pdgf</b>                     | 1940 $\pm$ 135    | 2529 $\pm$ 96*    | .0003                    |
| <b>Angptl2</b>                  | 185 $\pm$ 25      | 264 $\pm$ 30*     | .039                     |
| <b>Pepck</b>                    | 31678 $\pm$ 3294  | 47008 $\pm$ 1719* | 3.7 x 10 <sup>-5</sup>   |
| <b>Pdk4</b>                     | 6559 $\pm$ 896    | 25898 $\pm$ 3357* | 2.6 x 10 <sup>-8</sup>   |
| <b>Tfam</b>                     | 918 $\pm$ 28      | 1138 $\pm$ 49*    | 0.0001                   |
| <b>CoxIV</b>                    | 39435 $\pm$ 1393  | 50584 $\pm$ 2733* | 0.0003                   |
